# Supplementary material
Source: PubMed Central journal article supplement (PMC7455619)
Supplement: 42770_2020_281_MOESM2_ESM.pdf [file 42770_2020_281_MOESM2_ESM.pdf]

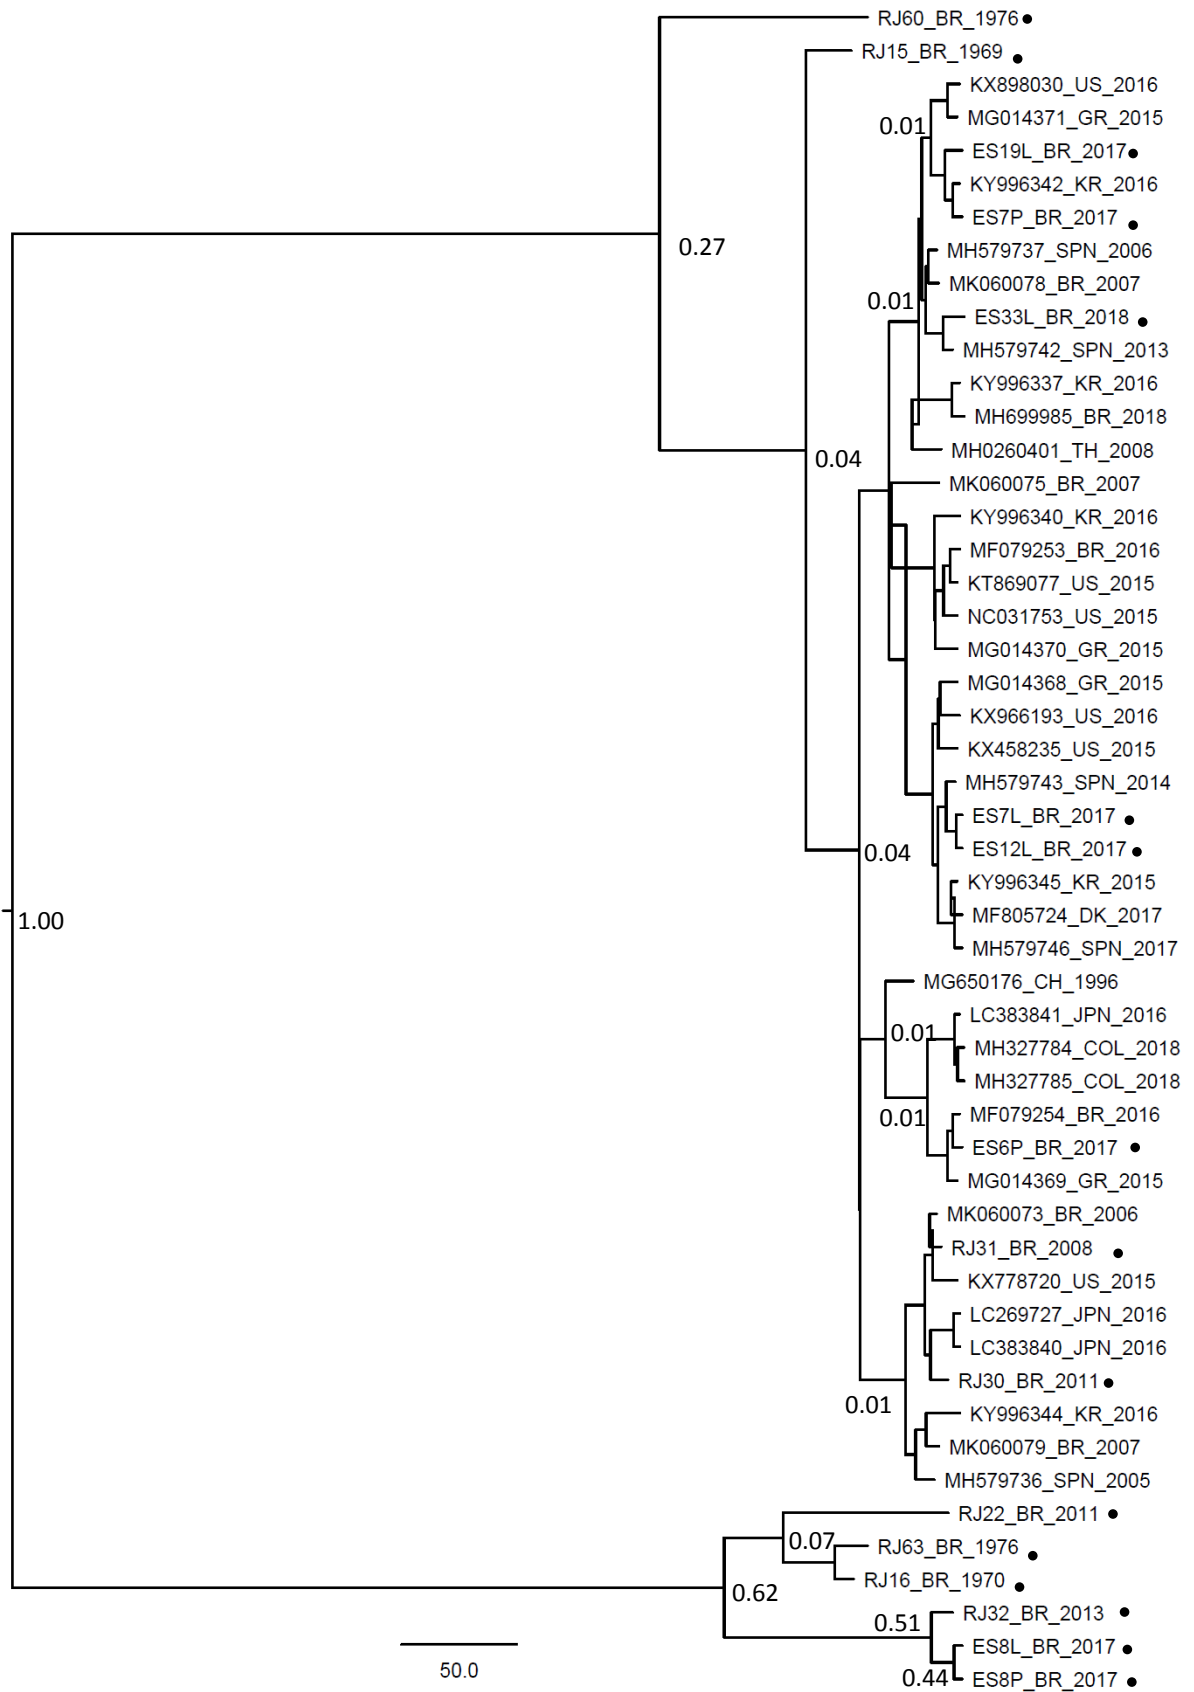

Supplementary File 2: Maximum clade credibility phylogenetic tree inferred by Bayesian Inference with HKY model, unrelaxed clock, coalescent constant size model and 100 million steps of MCMC with partial PCV3 capsid genomes (obtained through BEAST analysis). The samples of this study were marked in black.
